# Supplementary material for: Magnetic and Electronic Structural Properties of the S3 State of Nature’s Water Oxidizing Complex: A Combined Study in ELDOR-Detected Nuclear Magnetic Resonance Spectral Simulation and Broken-Symmetry Density Functional Theory
Source: PubMed Central journal article supplement (PMC9670293; doi:10.1021/acsomega.2c06151), 2022-11-03
Supplement: ao2c06151_si_001.pdf [file ao2c06151_si_001.pdf]

Supporting Information for

**The magnetic and electronic structural properties of the  $S_3$  state of Nature's water oxidising complex: a combined study in ELDOR-Detected Nuclear Magnetic Resonance spectral simulation and Broken Symmetry Density Functional Theory.**

Ciarán J. Rogers,<sup>a</sup> Olivia Hardwick,<sup>a</sup> Thomas A. Corry,<sup>a</sup> Felix Rummel,<sup>a</sup> David Collison,<sup>a</sup>  
Alice M. Bowen<sup>a\*</sup> and Patrick J. O'Malley<sup>a\*</sup>

<sup>a</sup> Department of Chemistry and Photon Science Institute, The University of Manchester, Oxford Road,  
Manchester M13 9PL, U.K

\*Email: [alice.bowen@manchester.ac.uk](mailto:alice.bowen@manchester.ac.uk)

\*Email: [patrick.omalley@manchester.ac.uk](mailto:patrick.omalley@manchester.ac.uk)

## Table of contents

|                                                                    |    |
|--------------------------------------------------------------------|----|
| <b>Broken Symmetry Density Functional Theory (BS-DFT)</b> .....    | 2  |
| XYZ coordinates of methanol model used in BS-DFT calculations..... | 5  |
| XYZ coordinates of glycerol model used in BS-DFT calculations..... | 13 |
| <br>                                                               |    |
| <b>ELDOR-detected NMR (EDNMR) simulations</b> .....                | 21 |
| Supplementary EDNMR simulations .....                              | 22 |
| Bandwidth considerations in simulating EDNMR spectra.....          | 24 |
| Consideration of multi-quantum effects in EDNMR .....              | 26 |

## S1 Broken Symmetry Density Functional Theory (BS-DFT)

### Methods

All calculations were performed using ORCA 4<sup>1</sup> with models initially geometry optimised in the fully ferromagnetic state of (Mn<sup>IV</sup>)<sub>4</sub>.<sup>2</sup> Optimisation calculations used the BP86 functional<sup>3,4</sup> with the zeroth-order regular approximation (ZORA) Hamiltonian applied to include scalar relativistic effects.<sup>5-7</sup> ZORA versions of the def2-SVP basis sets were used for C and H atoms. ZORA versions of the def2-TZVP basis set with f functions removed were used for all other atoms.<sup>8</sup> The resolution of identity approximation (RI-J) for coulomb integrals, along with the decontracted general Weigend auxiliary basis sets were used.<sup>9-11</sup> Dispersion corrections proposed by Grimme with Becke-Johnson damping (D3BJ) were included.<sup>12,13</sup> The conductor-like polarizable continuum model (CPCM) with a dielectric constant  $\epsilon = 8.0$ <sup>14,15</sup> was applied in all calculations. Increased integration grids (Grid6 and IntAcc 6 in ORCA convention) and tight SCF convergence criteria were used. All terminal carbon atoms were constrained during optimisation calculations. Heisenberg exchange coupling constants ( $J_{ij}$ ) and hyperfine couplings were calculated using the broken symmetry DFT (BS-DFT) methodology proposed and justified by Pantazis *et al.*<sup>14,16</sup> The hybrid meta-GGA TPSSh functional was used for BS-DFT and EPR calculations. The chain of spheres (RIJCOSX) approximation to exact exchange was applied along with the same decontracted auxiliary basis sets involved in geometry optimization calculations.<sup>17,18</sup> ZORA versions of the def2-TZVP basis set with f functions removed was used for all atoms.<sup>8</sup> Initial BS guesses were constructed using the ‘flipspin’ feature of ORCA.<sup>19</sup> Convergence to the correct BS and HS states in all calculations was confirmed by examination of the calculated Mulliken spin populations. The ‘orca\_eca’ module within ORCA was used to calculate HDvV spin ladders and spin projection coefficients. Calculation of the hfc’s used basis sets for Mn, N and O atoms based on SARC def2-TZVP which have been developed by Neese *et al.*<sup>20</sup> These basis sets contained fully decontracted s-shells with three additional steep primitives added to the core, in addition to this the def2-TZVP(-f) basis set was used for all other atoms.<sup>11,20</sup> Increased integration grids were used for Mn, N and O, these were set to 11, 9 and 9, respectively. Picture change effects were applied for the

calculation of hfcs.  $^{55}\text{Mn}$  isotropic hfcs were scaled by an empirically derived factor of 1.7 to account for well known deficiencies of the Fermi contact term when calculated using DFT methods.<sup>21,22</sup>

For the  $S_3$  state of the WOC with  $\text{Mn}_{1-4}$  oxidation states IV–IV–IV–IV, a local  $S_z$  of 3/2 for the  $d^3$  ion Mn(IV) is used. The high-spin determinant can be described as  $|+3/2, +3/2, +3/2, +3/2\rangle$  (or “ $\alpha\alpha\alpha\alpha$ ”,  $M_S = 12$ ) and six BS determinants were created by inverting local spins of Mn ions. For example,  $|+3/2, +3/2, +3/2, -3/2\rangle$  (“ $\beta\alpha\alpha\alpha$ ”,  $M_S = 3$ ) or  $|+3/2, -3/2, -3/2, +3/2\rangle$  (“ $\alpha\beta\beta\alpha$ ”,  $M_S = 0$ ). Each BS determinant is described by an  $M_S$  value, rather than  $S$ , as this is not a spin eigenfunction. The relative energy of each BS determinant from the HS state was used to calculate a set of  $J_{ij}$  values for the  $S_z$ -only (Ising) Hamiltonian. The calculated exchange coupling constants are used to diagonalise the full HDvV Hamiltonian. The outcome of this step provides the resultant spin ladder and spin projection coefficients. The full details of the procedure have been described extensively in the literature and has been used successfully for many exchange-coupled Mn systems.<sup>14,16,23</sup>

Models used are described in the main text and more extensively characterised in reference <sup>24</sup>

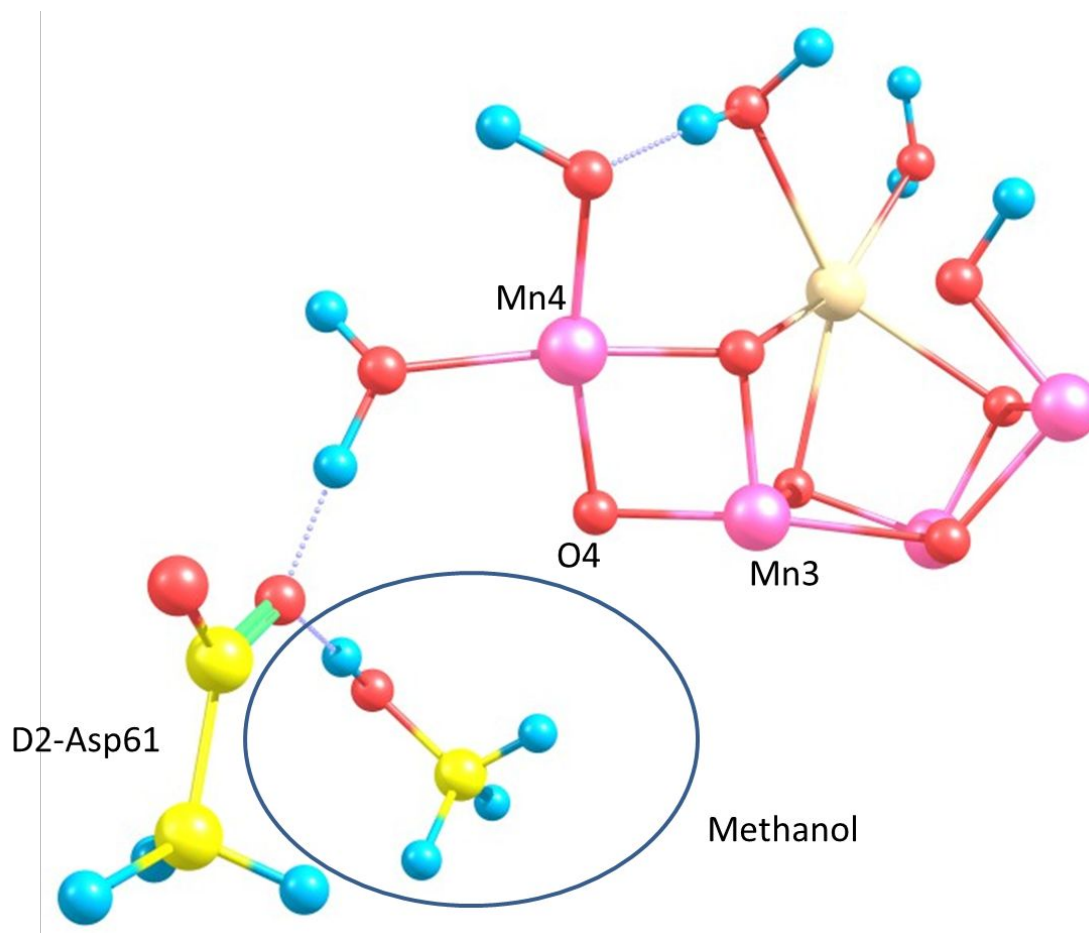

**Figure S1.** Selected atom illustration of models used with methanol molecule position highlighted. Oxygen (red), calcium (cream), manganese (pink), hydrogen (blue), carbon (yellow).

#### XYZ coordinates of methanol model used in BS-DFT calculations

##### Atom # (X, Y, Z)

|    |               |              |               |
|----|---------------|--------------|---------------|
| 20 | -32.671515428 | 39.489307649 | 363.584180984 |
| 8  | -33.018650467 | 39.748536667 | 366.012490981 |
| 8  | -31.630716961 | 37.683797038 | 364.894248099 |
| 8  | -33.693545758 | 37.372423491 | 366.352315303 |
| 8  | -32.181899877 | 35.389270382 | 363.401140112 |
| 8  | -33.681960113 | 37.265670638 | 363.336270384 |
| 8  | -34.968544182 | 38.986973797 | 364.465081482 |
| 25 | -34.711470325 | 38.985227367 | 366.239891309 |
| 25 | -32.037498697 | 38.311959898 | 366.554614723 |
| 25 | -32.943433739 | 36.353132769 | 364.703527054 |

|    |               |              |               |
|----|---------------|--------------|---------------|
| 25 | -33.344217995 | 36.033588254 | 362.054055568 |
| 6  | -32.875113052 | 30.227233866 | 362.898130926 |
| 6  | -33.257622092 | 31.395042748 | 361.984135629 |
| 8  | -32.360542496 | 32.318333874 | 361.820893494 |
| 8  | -34.403908518 | 31.414474412 | 361.462621006 |
| 1  | -33.524676000 | 29.356598865 | 362.717612791 |
| 1  | -33.001077215 | 30.548678399 | 363.948751336 |
| 1  | -31.816516813 | 29.949496653 | 362.760757831 |
| 6  | -29.225257007 | 44.614365003 | 356.400966994 |
| 6  | -30.366979934 | 43.570741299 | 356.453414923 |
| 6  | -31.200535683 | 43.515225605 | 357.729782243 |
| 6  | -31.345307452 | 42.316244349 | 358.463645015 |
| 6  | -31.924030051 | 44.635829039 | 358.204329144 |
| 6  | -32.161213305 | 42.236564841 | 359.607849748 |
| 6  | -32.753733162 | 44.567090192 | 359.336042047 |
| 6  | -32.891411942 | 43.358085590 | 360.073008419 |
| 8  | -33.661837804 | 43.278519411 | 361.182751116 |
| 1  | -29.610084731 | 45.642369200 | 356.530778952 |
| 1  | -31.049564386 | 43.761533720 | 355.599951753 |
| 1  | -29.942557370 | 42.564394144 | 356.275749254 |
| 1  | -30.790926354 | 41.423826991 | 358.140498360 |
| 1  | -31.855178995 | 45.589740670 | 357.663058338 |
| 1  | -32.202948534 | 41.321349296 | 360.211407901 |
| 1  | -33.311039606 | 45.457070502 | 359.653952008 |
| 1  | -28.482024680 | 44.430485352 | 357.198486816 |
| 1  | -28.705838368 | 44.568879467 | 355.427547392 |
| 6  | -29.415390997 | 43.202243003 | 361.215080004 |
| 6  | -29.747502929 | 43.996907487 | 362.459418143 |
| 7  | -29.006949080 | 45.099795013 | 362.686811715 |
| 8  | -30.683310240 | 43.677729660 | 363.233975593 |
| 1  | -28.351776411 | 43.289235014 | 360.940075277 |
| 1  | -30.025715370 | 43.579674113 | 360.375998117 |

|   |               |              |               |
|---|---------------|--------------|---------------|
| 1 | -28.247781433 | 45.370655748 | 362.070677880 |
| 1 | -29.197484503 | 45.681310098 | 363.498341907 |
| 1 | -29.679672066 | 42.145440618 | 361.370445074 |
| 6 | -30.219861971 | 34.365225051 | 357.883357042 |
| 6 | -31.264096635 | 35.429758651 | 358.117025507 |
| 8 | -32.463714493 | 35.104410694 | 358.331224329 |
| 1 | -30.533794659 | 33.734293360 | 357.034150692 |
| 7 | -30.842932860 | 36.704469168 | 358.093937871 |
| 6 | -31.676155581 | 37.874163704 | 358.348179859 |
| 6 | -31.171256001 | 38.702690021 | 359.529733928 |
| 6 | -31.448563546 | 38.116708195 | 360.931109749 |
| 8 | -31.157661934 | 38.817630615 | 361.932155843 |
| 8 | -31.995525321 | 36.946578890 | 360.963755688 |
| 1 | -29.858206586 | 36.867096973 | 357.897160585 |
| 1 | -32.700187564 | 37.519071515 | 358.537416290 |
| 1 | -30.089428435 | 38.919347455 | 359.448870324 |
| 1 | -31.681096673 | 39.677518400 | 359.520819289 |
| 1 | -30.173440456 | 33.715311787 | 358.775175001 |
| 1 | -29.216559917 | 34.774704247 | 357.683936104 |
| 1 | -31.697749301 | 38.504999662 | 357.441039969 |
| 6 | -36.337962993 | 42.830694024 | 366.005324987 |
| 6 | -36.059797980 | 41.456786143 | 365.501460922 |
| 8 | -36.382664790 | 41.096982992 | 364.336549986 |
| 8 | -35.486283189 | 40.709865476 | 366.390585045 |
| 1 | -35.458822294 | 43.223743877 | 366.539444829 |
| 1 | -37.155254966 | 42.774747880 | 366.744430984 |
| 1 | -36.634765382 | 43.509462640 | 365.191024811 |
| 6 | -36.143600990 | 48.444124976 | 363.039909998 |
| 6 | -35.122114550 | 47.382151989 | 362.845162295 |
| 6 | -35.195294116 | 46.136337470 | 362.251254139 |
| 7 | -33.810233170 | 47.514661506 | 363.275664056 |
| 6 | -33.117765802 | 46.401143274 | 362.961822892 |

|   |               |              |               |
|---|---------------|--------------|---------------|
| 7 | -33.946011775 | 45.554174302 | 362.339571266 |
| 1 | -37.078396458 | 48.162511210 | 362.529728867 |
| 1 | -35.800678537 | 49.410399679 | 362.630148296 |
| 1 | -36.031380813 | 45.629757502 | 361.769891181 |
| 1 | -32.065125913 | 46.225377064 | 363.173997594 |
| 1 | -33.737356214 | 44.562289678 | 361.873667286 |
| 1 | -36.372220759 | 48.596705714 | 364.110385780 |
| 6 | -34.808006004 | 51.803416027 | 365.723829003 |
| 6 | -34.386315225 | 50.357829315 | 365.478854244 |
| 7 | -34.895926059 | 49.420913707 | 366.309280743 |
| 8 | -33.610922699 | 50.049181628 | 364.541982188 |
| 1 | -35.459898836 | 51.915806322 | 366.604219076 |
| 1 | -35.336695118 | 52.172592751 | 364.827861769 |
| 1 | -34.643025271 | 48.437919081 | 366.195561538 |
| 1 | -35.523881748 | 49.664747136 | 367.068097423 |
| 1 | -33.902592135 | 52.420273496 | 365.855040043 |
| 1 | -33.479173897 | 48.358787239 | 363.789000854 |
| 6 | -40.803980999 | 40.323172986 | 369.348550007 |
| 6 | -40.848031648 | 38.953172220 | 369.950417086 |
| 8 | -40.347974614 | 37.940117922 | 369.394666397 |
| 1 | -41.280108095 | 40.302989348 | 368.352350293 |
| 7 | -41.456783957 | 38.852048652 | 371.139561562 |
| 6 | -41.546156001 | 37.584363004 | 371.824189994 |
| 1 | -41.862460764 | 39.679774197 | 371.564253446 |
| 1 | -40.541096516 | 37.171595426 | 372.023130073 |
| 6 | -39.840339010 | 36.699967996 | 365.631931016 |
| 6 | -38.579261319 | 37.310607606 | 366.164441632 |
| 6 | -37.307758181 | 37.464382483 | 365.628882112 |
| 7 | -38.524716484 | 37.918373256 | 367.414035213 |
| 6 | -37.288156326 | 38.415177111 | 367.613849183 |
| 7 | -36.520954335 | 38.151712805 | 366.545529790 |
| 1 | -39.664847758 | 36.285120625 | 364.626407918 |



|   |               |              |               |
|---|---------------|--------------|---------------|
| 1 | -40.645213318 | 37.453601995 | 365.556438821 |
| 1 | -36.907750300 | 37.164327652 | 364.660781940 |
| 1 | -36.974032125 | 38.989547870 | 368.484615087 |
| 1 | -40.202469845 | 35.884310743 | 366.283851205 |
| 1 | -39.304359747 | 37.973430132 | 368.124317739 |
| 1 | -42.104053585 | 36.845784259 | 371.221297832 |
| 1 | -42.068466251 | 37.730258483 | 372.781413125 |
| 1 | -39.751913744 | 40.628041535 | 369.198847670 |
| 1 | -41.306485623 | 41.081147442 | 369.969988745 |
| 6 | -33.839932002 | 34.207894009 | 371.940714991 |
| 6 | -34.110036300 | 34.785743916 | 370.579052407 |
| 6 | -33.429387144 | 35.705822200 | 369.793527194 |
| 7 | -35.223046566 | 34.424750473 | 369.823164664 |
| 6 | -35.229685904 | 35.075821344 | 368.646780495 |
| 7 | -34.147533775 | 35.857865735 | 368.613937379 |
| 1 | -34.669060307 | 34.432897830 | 372.634702379 |
| 1 | -32.913026495 | 34.638464944 | 372.349982828 |
| 1 | -32.501879135 | 36.254045511 | 369.982433181 |
| 1 | -35.975492884 | 34.980551229 | 367.859703913 |
| 1 | -33.922017317 | 36.469631555 | 367.779796862 |
| 1 | -33.724029162 | 33.110962039 | 371.885105245 |
| 1 | -35.937319863 | 33.758326098 | 370.110468572 |
| 6 | -33.607831002 | 39.695785988 | 370.356862037 |
| 6 | -33.539307658 | 39.180210233 | 368.941013757 |
| 8 | -32.396028364 | 38.804355088 | 368.489548008 |
| 8 | -34.607143989 | 39.163101228 | 368.252074871 |
| 1 | -34.520297285 | 39.324248486 | 370.850788978 |
| 1 | -33.684058067 | 40.798576333 | 370.301701842 |
| 1 | -32.714668302 | 39.416295399 | 370.934635639 |
| 6 | -29.063083976 | 41.225435884 | 366.547867925 |
| 6 | -30.098917974 | 40.303691598 | 365.929960125 |
| 8 | -30.565023634 | 40.475283327 | 364.786145699 |

|   |               |              |               |
|---|---------------|--------------|---------------|
| 8 | -30.446664359 | 39.328978663 | 366.742123327 |
| 1 | -28.564924691 | 41.829407102 | 365.773704568 |
| 1 | -28.324925708 | 40.654210333 | 367.133444095 |
| 1 | -29.597955878 | 41.901276893 | 367.240103039 |
| 6 | -30.495675919 | 34.518567080 | 367.650801117 |
| 6 | -31.300508816 | 35.565549423 | 366.971648039 |
| 8 | -31.122100954 | 36.774874901 | 367.361713117 |
| 8 | -32.087730569 | 35.190529804 | 366.052603530 |
| 1 | -30.943028927 | 33.523104922 | 367.512510448 |
| 1 | -30.377276994 | 34.735549239 | 368.724933160 |
| 1 | -29.484438126 | 34.511253484 | 367.202843442 |
| 6 | -25.861543109 | 37.415810044 | 363.979978037 |
| 7 | -26.949903536 | 36.526300648 | 363.519965514 |
| 6 | -28.278483867 | 36.687665220 | 363.713695198 |
| 7 | -28.759135081 | 37.772549499 | 364.343819362 |
| 7 | -29.151936942 | 35.751692074 | 363.302164394 |
| 1 | -25.829465352 | 38.353652289 | 363.396201937 |
| 1 | -25.986702795 | 37.652499072 | 365.050603203 |
| 1 | -26.680215373 | 35.737278952 | 362.940643393 |
| 1 | -28.203570117 | 38.618032169 | 364.399558058 |
| 1 | -29.779088560 | 37.847849205 | 364.488897701 |
| 1 | -28.883034091 | 34.808606303 | 363.017497328 |
| 1 | -30.169667423 | 35.895959324 | 363.368092785 |
| 1 | -24.914331300 | 36.875418174 | 363.844140027 |
| 1 | -32.713836252 | 34.678933656 | 359.949638737 |
| 8 | -30.509794567 | 37.544313818 | 370.131170906 |
| 1 | -30.131817349 | 37.050552781 | 369.377265004 |
| 1 | -31.122901773 | 38.154568017 | 369.654432576 |
| 8 | -34.629465054 | 36.908356084 | 361.024693158 |
| 1 | -34.798552724 | 36.470953184 | 360.148283154 |
| 8 | -37.854228006 | 44.252038213 | 368.955000019 |
| 1 | -37.618505958 | 43.275932436 | 369.064642000 |

|   |               |              |               |
|---|---------------|--------------|---------------|
| 1 | -38.487902041 | 44.282437532 | 368.215682545 |
| 8 | -33.052755251 | 34.508678728 | 360.870063280 |
| 1 | -32.772650699 | 33.539989303 | 361.252166507 |
| 8 | -35.781444934 | 41.520588180 | 361.611235404 |
| 1 | -35.089166301 | 42.212458537 | 361.405134176 |
| 1 | -36.015564273 | 41.617535838 | 362.564964207 |
| 8 | -38.272544117 | 35.121211607 | 361.121131888 |
| 1 | -37.992364355 | 35.889171298 | 360.556509779 |
| 1 | -37.601062881 | 34.432600212 | 360.918671482 |
| 8 | -35.888137391 | 33.539037510 | 360.569896840 |
| 1 | -35.562184551 | 34.105576711 | 361.316666006 |
| 1 | -35.331935388 | 32.719051302 | 360.728947406 |
| 8 | -32.694642306 | 41.860651555 | 363.147945276 |
| 1 | -31.788636183 | 42.279812444 | 363.178732435 |
| 1 | -33.096283012 | 42.325570310 | 362.326635901 |
| 8 | -35.239509013 | 35.449820359 | 358.717569291 |
| 1 | -35.392293520 | 34.643022496 | 359.296992191 |
| 1 | -34.302314144 | 35.386697790 | 358.417380292 |
| 8 | -36.904060532 | 39.858062527 | 359.443779144 |
| 1 | -35.997048386 | 39.940636531 | 359.037415665 |
| 1 | -36.807047625 | 40.383269418 | 360.269083289 |
| 8 | -35.284833441 | 45.211656821 | 368.691962422 |
| 1 | -36.254675681 | 44.985183186 | 368.634474362 |
| 1 | -34.993629086 | 45.497581733 | 367.788355580 |
| 8 | -34.490826011 | 42.628521257 | 369.137899091 |
| 1 | -33.839635531 | 42.386260971 | 368.413011453 |
| 1 | -34.695423357 | 43.597007556 | 368.982289162 |
| 8 | -32.561789964 | 42.087017254 | 367.300442382 |
| 1 | -32.734801256 | 41.218341560 | 366.837924455 |
| 1 | -32.579394467 | 42.752061163 | 366.565170065 |
| 8 | -34.018332638 | 39.455421826 | 361.422703337 |
| 1 | -34.792950428 | 40.075098154 | 361.543919547 |

|   |               |              |               |
|---|---------------|--------------|---------------|
| 1 | -34.377432248 | 38.509734307 | 361.288218593 |
| 8 | -34.018475646 | 46.096253773 | 366.327146594 |
| 1 | -33.219869983 | 46.390627349 | 366.805376613 |
| 1 | -33.685644825 | 45.327314999 | 365.791575241 |
| 8 | -34.244727559 | 39.991399059 | 358.712087122 |
| 1 | -33.864851135 | 40.882440098 | 358.569096321 |
| 1 | -34.017498944 | 39.788899650 | 359.663965545 |
| 8 | -32.779482789 | 43.847705671 | 365.121823544 |
| 1 | -31.894222403 | 44.076043136 | 364.749252760 |
| 1 | -33.066667003 | 43.145572157 | 364.476649460 |
| 8 | -36.998442994 | 41.706679431 | 369.240833889 |
| 1 | -36.011726263 | 41.914906983 | 369.124046100 |
| 1 | -37.078759095 | 41.455446929 | 370.179077236 |
| 6 | -36.376178960 | 33.719203039 | 364.230245990 |
| 6 | -35.168862137 | 34.631317030 | 363.964511570 |
| 8 | -34.535230661 | 35.138497460 | 364.950239122 |
| 8 | -34.843492696 | 34.847956081 | 362.745045513 |
| 1 | -37.241978016 | 34.102292456 | 363.662961269 |
| 1 | -36.144438225 | 32.708469477 | 363.851810888 |
| 1 | -36.600578775 | 33.679720652 | 365.305513994 |
| 8 | -37.496030732 | 37.118464941 | 359.268286623 |
| 1 | -37.249506482 | 38.065880679 | 359.448364859 |
| 1 | -36.662164125 | 36.686346994 | 358.968749826 |
| 1 | -35.653526521 | 39.709018666 | 364.258264548 |
| 6 | -30.173037937 | 32.767165174 | 364.373334559 |
| 1 | -29.238036138 | 32.982120702 | 364.920953973 |
| 1 | -30.527302516 | 31.762165853 | 364.682176475 |
| 8 | -29.884549821 | 32.822398864 | 362.968997534 |
| 1 | -30.934707787 | 33.518043683 | 364.657134382 |
| 1 | -30.758365174 | 32.668985702 | 362.514657781 |

### XYZ coordinates of glycerol model used in BS-DFT calculations

#### Atom # (X, Y, Z)

|    |               |              |               |
|----|---------------|--------------|---------------|
| 20 | -32.770637535 | 39.509747637 | 363.577017693 |
| 8  | -33.047204609 | 39.748895257 | 366.011100861 |
| 8  | -31.697160344 | 37.707544042 | 364.853960830 |
| 8  | -33.706387630 | 37.358984262 | 366.340966834 |
| 8  | -32.280485674 | 35.363644248 | 363.353947703 |
| 8  | -33.740416035 | 37.270107787 | 363.329777028 |
| 8  | -35.014845652 | 38.979773848 | 364.480263368 |
| 25 | -34.733562071 | 38.978602015 | 366.251785809 |
| 25 | -32.053833669 | 38.308796693 | 366.529027316 |
| 25 | -32.980411458 | 36.354954879 | 364.684981259 |
| 25 | -33.433387233 | 36.049890427 | 362.022703496 |
| 6  | -32.875113307 | 30.227233879 | 362.898131289 |
| 6  | -33.392742114 | 31.399521962 | 362.050088842 |
| 8  | -32.539761981 | 32.352575159 | 361.866608924 |
| 8  | -34.574283635 | 31.377110600 | 361.606195099 |
| 1  | -33.557770127 | 29.364450859 | 362.847428301 |
| 1  | -32.793317614 | 30.557593752 | 363.949943355 |
| 1  | -31.865731132 | 29.931292616 | 362.565265117 |
| 6  | -29.225256615 | 44.614364720 | 356.400966597 |
| 6  | -30.368900098 | 43.571728969 | 356.448347736 |
| 6  | -31.209493549 | 43.515404800 | 357.720301973 |
| 6  | -31.333829752 | 42.324027409 | 358.469894132 |
| 6  | -31.960558796 | 44.626452203 | 358.174657002 |
| 6  | -32.155227930 | 42.241951369 | 359.610461441 |
| 6  | -32.795920686 | 44.555020859 | 359.302003544 |
| 6  | -32.912021861 | 43.354019027 | 360.055891408 |
| 8  | -33.687343056 | 43.276115141 | 361.162681234 |
| 1  | -29.609790117 | 45.642501245 | 356.530968294 |
| 1  | -31.047029254 | 43.763553401 | 355.591707244 |

|   |               |              |               |
|---|---------------|--------------|---------------|
| 1 | -29.944127718 | 42.565217864 | 356.272420248 |
| 1 | -30.758828362 | 41.439186862 | 358.162214516 |
| 1 | -31.909483019 | 45.573779310 | 357.619918278 |
| 1 | -32.178821364 | 41.333787052 | 360.225921746 |
| 1 | -33.375382806 | 45.436442483 | 359.604103795 |
| 1 | -28.485008756 | 44.428554712 | 357.200793474 |
| 1 | -28.702752651 | 44.569221732 | 355.429207503 |
| 6 | -29.415390682 | 43.202242844 | 361.215079876 |
| 6 | -29.743187709 | 43.975977603 | 362.473892445 |
| 7 | -28.966066536 | 45.042691723 | 362.747197860 |
| 8 | -30.707425678 | 43.673068719 | 363.219440268 |
| 1 | -28.353356419 | 43.292344736 | 360.935704722 |
| 1 | -30.031621066 | 43.592230465 | 360.386307786 |
| 1 | -28.186061640 | 45.302566795 | 362.152785526 |
| 1 | -29.155003193 | 45.611346170 | 363.568195361 |
| 1 | -29.680405979 | 42.143206746 | 361.354453368 |
| 6 | -30.219862172 | 34.365225156 | 357.883356707 |
| 6 | -31.265979343 | 35.428872538 | 358.117838683 |
| 8 | -32.465267696 | 35.105788785 | 358.330534722 |
| 1 | -30.548964550 | 33.711636798 | 357.057675238 |
| 7 | -30.839285165 | 36.702884313 | 358.095611476 |
| 6 | -31.665713258 | 37.878695414 | 358.340148099 |
| 6 | -31.171256296 | 38.702689534 | 359.529733563 |
| 6 | -31.510990334 | 38.137073983 | 360.926059524 |
| 8 | -31.260104607 | 38.857290173 | 361.925789446 |
| 8 | -32.059310129 | 36.967852244 | 360.956250203 |
| 1 | -29.853368899 | 36.859965935 | 357.900835845 |
| 1 | -32.696000942 | 37.533213534 | 358.513109531 |
| 1 | -30.080474517 | 38.881191404 | 359.482179370 |
| 1 | -31.646576485 | 39.694196408 | 359.496617282 |
| 1 | -30.147770517 | 33.740422289 | 358.791633663 |
| 1 | -29.224445605 | 34.776986685 | 357.651665274 |

|   |               |              |               |
|---|---------------|--------------|---------------|
| 1 | -31.667502676 | 38.510667898 | 357.433455709 |
| 6 | -36.337962692 | 42.830693795 | 366.005324996 |
| 6 | -36.082419250 | 41.449748795 | 365.510459304 |
| 8 | -36.413263777 | 41.089277359 | 364.347984554 |
| 8 | -35.515433623 | 40.699886335 | 366.402668576 |
| 1 | -35.443968741 | 43.220313110 | 366.517256166 |
| 1 | -37.140162322 | 42.792452540 | 366.761789781 |
| 1 | -36.643302232 | 43.503811115 | 365.189557026 |
| 6 | -36.143600871 | 48.444125326 | 363.039910483 |
| 6 | -35.123609713 | 47.382132026 | 362.838301942 |
| 6 | -35.199653810 | 46.139209793 | 362.238802590 |
| 7 | -33.810679734 | 47.511031739 | 363.266643682 |
| 6 | -33.119951259 | 46.398220910 | 362.946022278 |
| 7 | -33.950835523 | 45.555350590 | 362.321704350 |
| 1 | -37.079138753 | 48.166431264 | 362.528939229 |
| 1 | -35.799770232 | 49.412176143 | 362.635238065 |
| 1 | -36.037461143 | 45.635810860 | 361.757156956 |
| 1 | -32.067032853 | 46.219942580 | 363.154855679 |
| 1 | -33.748024271 | 44.564223397 | 361.855206387 |
| 1 | -36.371319270 | 48.591177503 | 364.111367615 |
| 6 | -34.808006280 | 51.803415642 | 365.723829254 |
| 6 | -34.389116229 | 50.356567663 | 365.478031419 |
| 7 | -34.900413817 | 49.420742363 | 366.308155680 |
| 8 | -33.614215855 | 50.046695296 | 364.541090258 |
| 1 | -35.462549617 | 51.916104440 | 366.602205658 |
| 1 | -35.332490870 | 52.175503709 | 364.826666280 |
| 1 | -34.649320141 | 48.437188906 | 366.194416085 |
| 1 | -35.527725818 | 49.665950078 | 367.067050263 |
| 1 | -33.901318725 | 52.417481303 | 365.859278837 |
| 1 | -33.477598494 | 48.353140369 | 363.781485225 |
| 6 | -40.803980832 | 40.323172631 | 369.348550475 |
| 6 | -40.855968218 | 38.952780719 | 369.949004348 |

|   |               |              |               |
|---|---------------|--------------|---------------|
| 8 | -40.369567952 | 37.935565434 | 369.388364156 |
| 1 | -41.283809038 | 40.307768986 | 368.354114958 |
| 7 | -41.455288319 | 38.853803668 | 371.142828740 |
| 6 | -41.546155973 | 37.584363353 | 371.824189927 |
| 1 | -41.851109818 | 39.683199214 | 371.573574078 |
| 1 | -40.541845533 | 37.164412927 | 372.011301415 |
| 6 | -39.840339363 | 36.699967859 | 365.631930627 |
| 6 | -38.583577802 | 37.302559191 | 366.176402222 |
| 6 | -37.310655256 | 37.454143008 | 365.646538545 |
| 7 | -38.533556785 | 37.903328339 | 367.429208074 |
| 6 | -37.296992563 | 38.395925819 | 367.636599636 |
| 7 | -36.527170554 | 38.135167962 | 366.569529791 |
| 1 | -39.660204599 | 36.295181373 | 364.623092100 |
| 1 | -40.644150784 | 37.455117738 | 365.559490691 |
| 1 | -36.907844564 | 37.159698803 | 364.677995025 |
| 1 | -36.984073510 | 38.965473619 | 368.510817782 |
| 1 | -40.208132157 | 35.878040518 | 366.272838325 |
| 1 | -39.318639243 | 37.960609973 | 368.134409644 |
| 1 | -42.115088222 | 36.851597914 | 371.224587200 |
| 1 | -42.057684083 | 37.730554472 | 372.787184535 |
| 1 | -39.750136498 | 40.620426693 | 369.195685252 |
| 1 | -41.298460772 | 41.083933449 | 369.973009825 |
| 6 | -33.839931995 | 34.207894354 | 371.940715029 |
| 6 | -34.108027329 | 34.777232952 | 370.575421582 |
| 6 | -33.429667415 | 35.698305753 | 369.789369112 |
| 7 | -35.215159910 | 34.405363104 | 369.816088401 |
| 6 | -35.221339978 | 35.052012948 | 368.637402372 |
| 7 | -34.143546603 | 35.840480485 | 368.606111833 |
| 1 | -34.673410397 | 34.430788862 | 372.630182504 |
| 1 | -32.917629242 | 34.646522708 | 372.351819779 |
| 1 | -32.504758179 | 36.251183341 | 369.979311743 |
| 1 | -35.963843410 | 34.949842959 | 367.848076467 |



|   |               |              |               |
|---|---------------|--------------|---------------|
| 1 | -33.921423054 | 36.453986184 | 367.773590115 |
| 1 | -33.716490487 | 33.111487280 | 371.891177057 |
| 1 | -35.925936257 | 33.734937087 | 370.102778848 |
| 6 | -33.607831281 | 39.695786438 | 370.356861884 |
| 6 | -33.542164489 | 39.171972493 | 368.940956865 |
| 8 | -32.404281155 | 38.791190651 | 368.480411875 |
| 8 | -34.615365625 | 39.153429287 | 368.258805846 |
| 1 | -34.507766511 | 39.306825070 | 370.860268505 |
| 1 | -33.707953370 | 40.796258759 | 370.295364291 |
| 1 | -32.703624804 | 39.437948636 | 370.927449455 |
| 6 | -29.063084358 | 41.225436123 | 366.547868088 |
| 6 | -30.109933178 | 40.310921559 | 365.930041933 |
| 8 | -30.569000837 | 40.488212088 | 364.778710271 |
| 8 | -30.468724690 | 39.339930992 | 366.732109671 |
| 1 | -28.560326114 | 41.822864197 | 365.771641873 |
| 1 | -28.331602699 | 40.645650701 | 367.133343812 |
| 1 | -29.589391329 | 41.908414548 | 367.239524018 |
| 6 | -30.495676522 | 34.518567241 | 367.650800958 |
| 6 | -31.281300687 | 35.559614846 | 366.929528614 |
| 8 | -31.123682362 | 36.772521195 | 367.320442213 |
| 8 | -32.041472150 | 35.180302251 | 365.987633007 |
| 1 | -30.917104313 | 33.517663213 | 367.475575443 |
| 1 | -30.465225125 | 34.728886622 | 368.732609031 |
| 1 | -29.450806653 | 34.522104449 | 367.288078669 |
| 6 | -25.861543029 | 37.415810191 | 363.979978216 |
| 7 | -27.149398360 | 36.788494260 | 363.728870459 |
| 6 | -28.306655645 | 37.467082447 | 363.662734630 |
| 7 | -28.317205760 | 38.807767315 | 363.824901514 |
| 7 | -29.439212803 | 36.823411507 | 363.386558375 |
| 1 | -25.667447238 | 38.225319118 | 363.253727658 |
| 1 | -25.789185351 | 37.828146699 | 365.005191548 |
| 1 | -27.235286134 | 35.763014036 | 363.794956231 |

|   |               |              |               |
|---|---------------|--------------|---------------|
| 1 | -27.549870926 | 39.263715721 | 364.306227200 |
| 1 | -29.207414534 | 39.308732911 | 363.805926212 |
| 1 | -29.451728318 | 35.845102750 | 363.049315153 |
| 1 | -30.336173726 | 37.250743551 | 363.640847547 |
| 1 | -25.076212966 | 36.654526621 | 363.861374422 |
| 1 | -32.745005420 | 34.678419669 | 359.981438954 |
| 8 | -30.534916207 | 37.515808543 | 370.124966058 |
| 1 | -30.121144203 | 37.024106929 | 369.389218715 |
| 1 | -31.132528738 | 38.123794577 | 369.625432414 |
| 8 | -34.704947965 | 36.937070291 | 360.994615895 |
| 1 | -34.860933182 | 36.490703324 | 360.120305271 |
| 8 | -37.868885442 | 44.250315927 | 368.955394751 |
| 1 | -37.633609370 | 43.274579741 | 369.068804878 |
| 1 | -38.509999194 | 44.277179356 | 368.222366045 |
| 8 | -33.149188836 | 34.512236362 | 360.873022927 |
| 1 | -32.904260070 | 33.495527328 | 361.300982871 |
| 8 | -35.846458200 | 41.554453295 | 361.597235900 |
| 1 | -35.141172100 | 42.233054440 | 361.392967785 |
| 1 | -36.073046605 | 41.647404048 | 362.552659144 |
| 8 | -38.342361394 | 35.152193534 | 361.022903294 |
| 1 | -38.041555548 | 35.906679254 | 360.451184673 |
| 1 | -37.664653513 | 34.457492416 | 360.865068480 |
| 8 | -35.968090306 | 33.520703763 | 360.588523373 |
| 1 | -35.639467922 | 34.111323661 | 361.313588596 |
| 1 | -35.448654498 | 32.687691511 | 360.804999176 |
| 8 | -32.737562643 | 41.876932332 | 363.141518495 |
| 1 | -31.826364315 | 42.284819811 | 363.167521636 |
| 1 | -33.132760185 | 42.338093408 | 362.312499251 |
| 8 | -35.254869402 | 35.417927975 | 358.704598800 |
| 1 | -35.415079874 | 34.620023139 | 359.290417317 |
| 1 | -34.308555784 | 35.358360523 | 358.432136655 |
| 8 | -36.911027360 | 39.860623191 | 359.378365106 |

|   |               |              |               |
|---|---------------|--------------|---------------|
| 1 | -35.991647143 | 39.957252960 | 359.003286702 |
| 1 | -36.850906379 | 40.376539927 | 360.211779528 |
| 8 | -35.301249264 | 45.211125462 | 368.688171579 |
| 1 | -36.270299491 | 44.982574889 | 368.626983110 |
| 1 | -35.007408333 | 45.498119224 | 367.785845697 |
| 8 | -34.503881643 | 42.629919340 | 369.139058907 |
| 1 | -33.856084708 | 42.388780078 | 368.410902274 |
| 1 | -34.711318663 | 43.597805254 | 368.982466542 |
| 8 | -32.585039503 | 42.090250638 | 367.289916961 |
| 1 | -32.757604925 | 41.219607512 | 366.830861888 |
| 1 | -32.604715294 | 42.753917799 | 366.553162129 |
| 8 | -34.103975460 | 39.477854412 | 361.431298787 |
| 1 | -34.878810936 | 40.100706642 | 361.534071857 |
| 1 | -34.461657832 | 38.535281899 | 361.278855792 |
| 8 | -34.032221678 | 46.105598546 | 366.326742924 |
| 1 | -33.235315213 | 46.404095275 | 366.805369133 |
| 1 | -33.695180887 | 45.340334608 | 365.788677784 |
| 8 | -34.235616915 | 40.011325134 | 358.719003356 |
| 1 | -33.845114490 | 40.898777224 | 358.580898344 |
| 1 | -34.033592620 | 39.812089670 | 359.677135599 |
| 8 | -32.796503633 | 43.856707085 | 365.116061934 |
| 1 | -31.908789215 | 44.077931546 | 364.744680718 |
| 1 | -33.090763825 | 43.161359697 | 364.466470104 |
| 8 | -37.011940792 | 41.705962031 | 369.248564876 |
| 1 | -36.025575912 | 41.914255287 | 369.131398252 |
| 1 | -37.092282500 | 41.458117391 | 370.187700902 |
| 6 | -36.376178862 | 33.719202696 | 364.230245656 |
| 6 | -35.199539619 | 34.650174829 | 363.956323164 |
| 8 | -34.546270291 | 35.135039930 | 364.940175141 |
| 8 | -34.922106528 | 34.899665440 | 362.731899889 |
| 1 | -37.259672117 | 34.079838657 | 363.676341456 |
| 1 | -36.125817041 | 32.715040632 | 363.844660599 |

|   |               |              |               |
|---|---------------|--------------|---------------|
| 1 | -36.588134617 | 33.666768497 | 365.307612404 |
| 8 | -37.512010761 | 37.119249312 | 359.156511410 |
| 1 | -37.258838162 | 38.061331691 | 359.352523208 |
| 1 | -36.673700106 | 36.674670701 | 358.889618129 |
| 1 | -35.705296758 | 39.698892244 | 364.276784529 |
| 6 | -29.746434393 | 33.117249729 | 363.179003828 |
| 1 | -29.169745857 | 32.426749834 | 362.529870883 |
| 1 | -30.676803718 | 32.590521991 | 363.464329027 |
| 6 | -28.918517916 | 33.445683725 | 364.419231450 |
| 1 | -29.409963955 | 34.265543740 | 364.974804773 |
| 6 | -28.729570182 | 32.246375947 | 365.350184305 |
| 1 | -29.703799603 | 31.933057126 | 365.766171288 |
| 1 | -28.314994583 | 31.389349229 | 364.774872599 |
| 8 | -30.060782335 | 34.282841118 | 362.414137325 |
| 1 | -30.961239155 | 34.604542618 | 362.728091479 |
| 8 | -27.881064253 | 32.576095950 | 366.456891948 |
| 1 | -27.120447299 | 33.055066018 | 366.067800585 |
| 8 | -27.608812862 | 33.979827660 | 364.069939520 |
| 1 | -27.219197292 | 33.395917970 | 363.388560631 |

## S2 ELDOR-detected NMR (EDNMR) simulations

The original *horseradish* code was modified slightly to run the algorithm using the developmental version of *Easyspin* available at Github repository: <https://github.com/StollLab/EasySpin>

All MATLAB code used for the ELDOR-detected NMR simulations in this work can be found in the GitHub repository:

<https://github.com/ciaranrogers16/MATLAB-scripts-for-EPR/tree/main/The-magnetic-and-electronic-structure-properties-of-the-S3-state-of-Nature%E2%80%99s-water-oxidising-complex:-a-combined-Eldor-Detected-Nuclear-Magnetic-Resonance-spectral-simulation-and-Broken-Symmetry-Density-Functional-Theory-study>.

### Supplementary EDNMR simulations

Simulation of  $\text{Mn}^{\text{IV}}$  centres (as assigned in main text – Fig 3) before summation, plotted relative to experimental EDNMR spectra, with an applied Lorentzian (FWHM = 400 MHz) function. The proton peak is associated with each of the Mn ions in the simulation. Resultantly all four Mn ions contribute to this peak around the proton Larmor frequency. This replicates the intensity of the spectral feature seen in the experimental data for the mononuclear calculations in the main text.

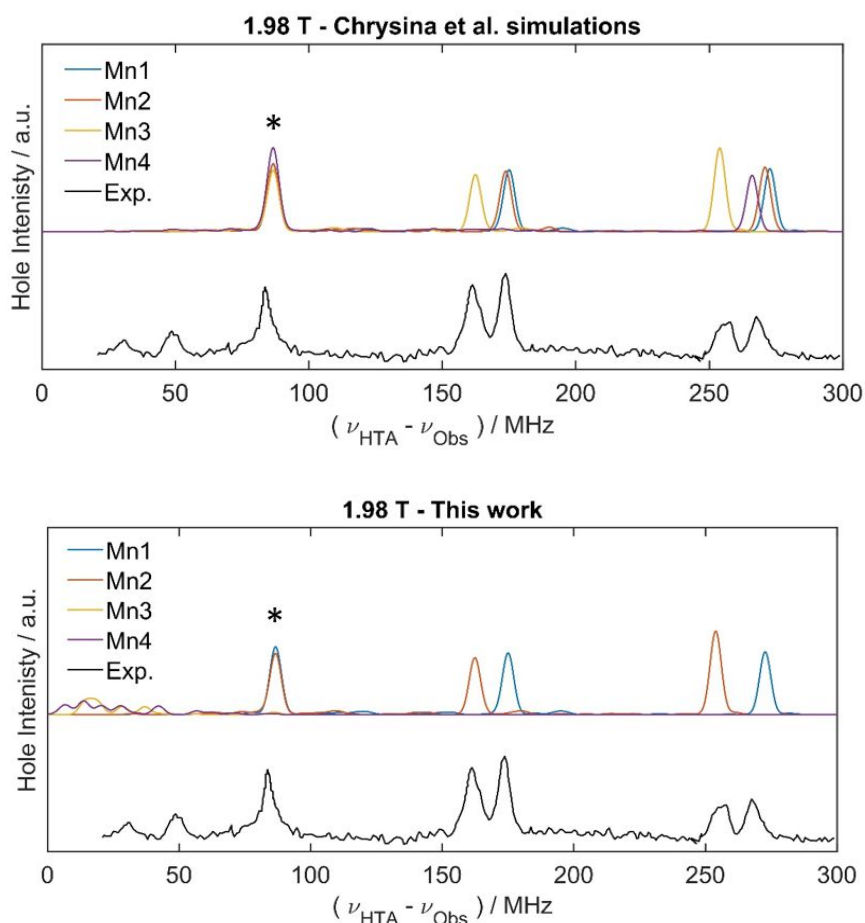

**Figure S2:** Spectral simulations using *horseradish* algorithm showing individual mononuclear Mn hyperfine coupling contributions compared to experimental spectrum (black) at 1.98 T.  $^1\text{H}$  peak denoted with an asterisk. Experimental EDNMR spectra (black) reproduced from reference 25.

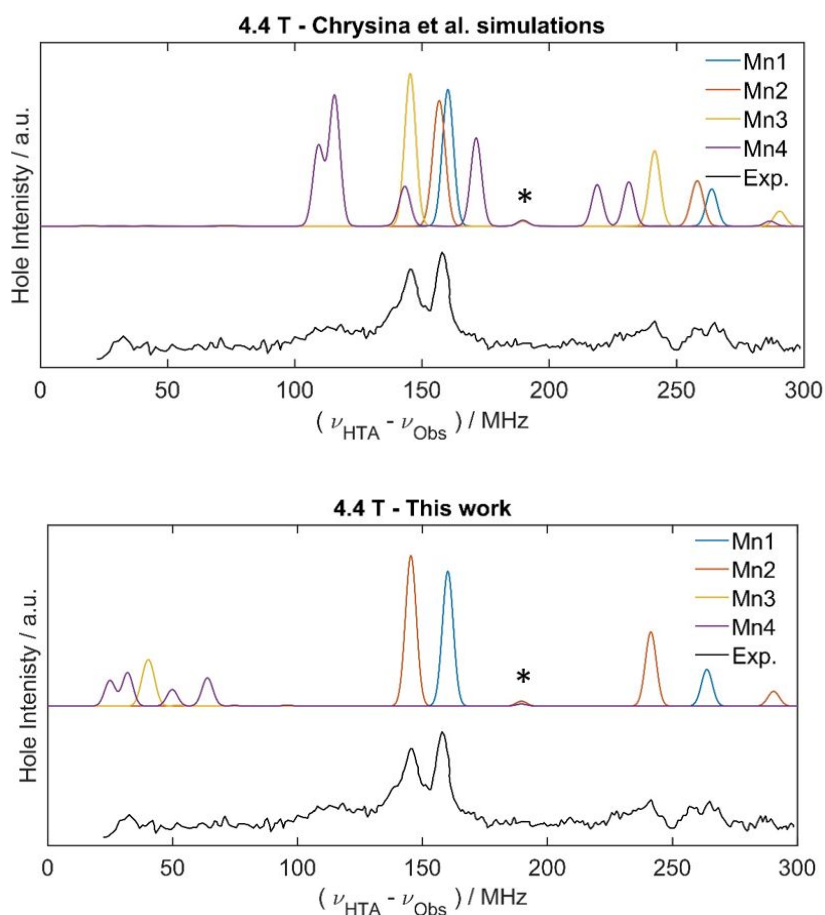

**Figure S3:** Spectral simulations using *horseradish* algorithm showing individual mononuclear Mn hyperfine coupling contributions compared to experimental spectrum (black) at 4.4 T.  $^1\text{H}$  peak denoted with an asterisk. Experimental EDNMR spectra (black) reproduced from reference 25.

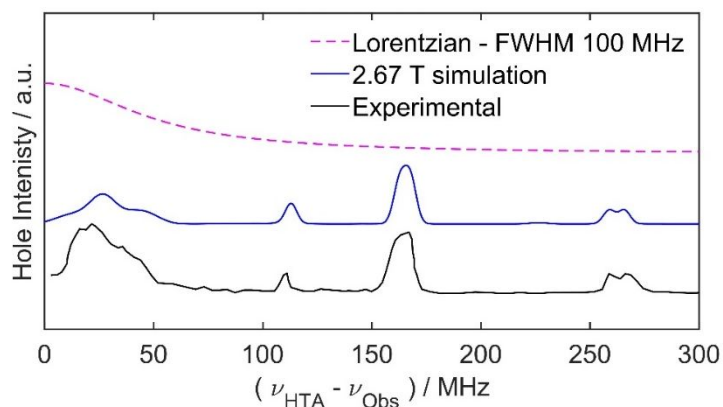

**Figure S4:** Spectral simulations using *horseradish* algorithm for the native Ca form of  $\text{S}_3$  state of the WOC (blue) compared to experimental spectrum (black)<sup>25</sup> at 2.67 T, with a Lorentzian bandwidth of FWHM = 100 MHz). Experimental EDNMR spectra (black) reproduced from reference 25.

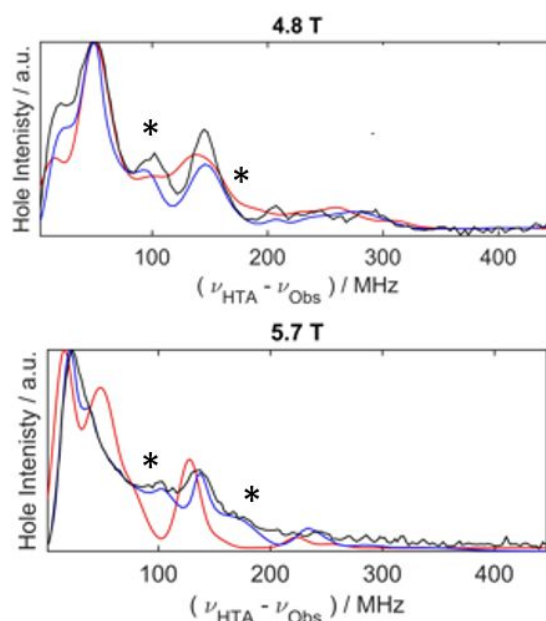

**Figure S5:** Spectral simulations using the *horseradish* algorithm for the MeOH trapped form of the  $S_3$  state of the WOC (red) compared to experimental spectrum (black) recorded by Marchiori *et al.*<sup>26</sup> and original simulations using *salt* (blue) at D-band ( $\sim 130$  GHz), with a Lorentzian bandwidth of FWHM = 300 MHz. The small  $^{55}\text{Mn}$  couplings occur in a region overlapping with  $^{14}\text{N}$  resonances. Small deviations of the simulations occur at resonance frequencies where multi-quantum transitions are expected to be present, as these are not included in the *horseradish* simulations (red) shown, which may further affect the amplitude and shift the position of the single quantum transitions. Marchiori *et al.* have included MQTs in their simulations,<sup>26</sup> with the asterisks showing where MQTs are expected to occur in the spectrum.

### Bandwidth considerations in simulating EDNMR spectra

As discussed in the main text, in order to model the effects of the bandwidth in the simulations of the experimental EDNMR data, a Lorentzian function with a FWHM of 400 MHz was chosen, as this best reproduced the results of the experimental spectra, in particular the relative intensities of the spectral features at both low and high fields. The simulation further assumes a symmetric bandwidth about the detection frequency ( $\nu_{\text{Obs}}$ ), as experimental spectra are often collected either side of  $\nu_{\text{Obs}}$  before summation of both sides to give the final spectrum. A symmetric bandwidth however cannot be assumed, and an asymmetry of this bandwidth may give rise to further inhomogeneities of the  $B_1$  field. The effect of varying the line-shape and FWHM of the applied simulated bandwidth is shown below.

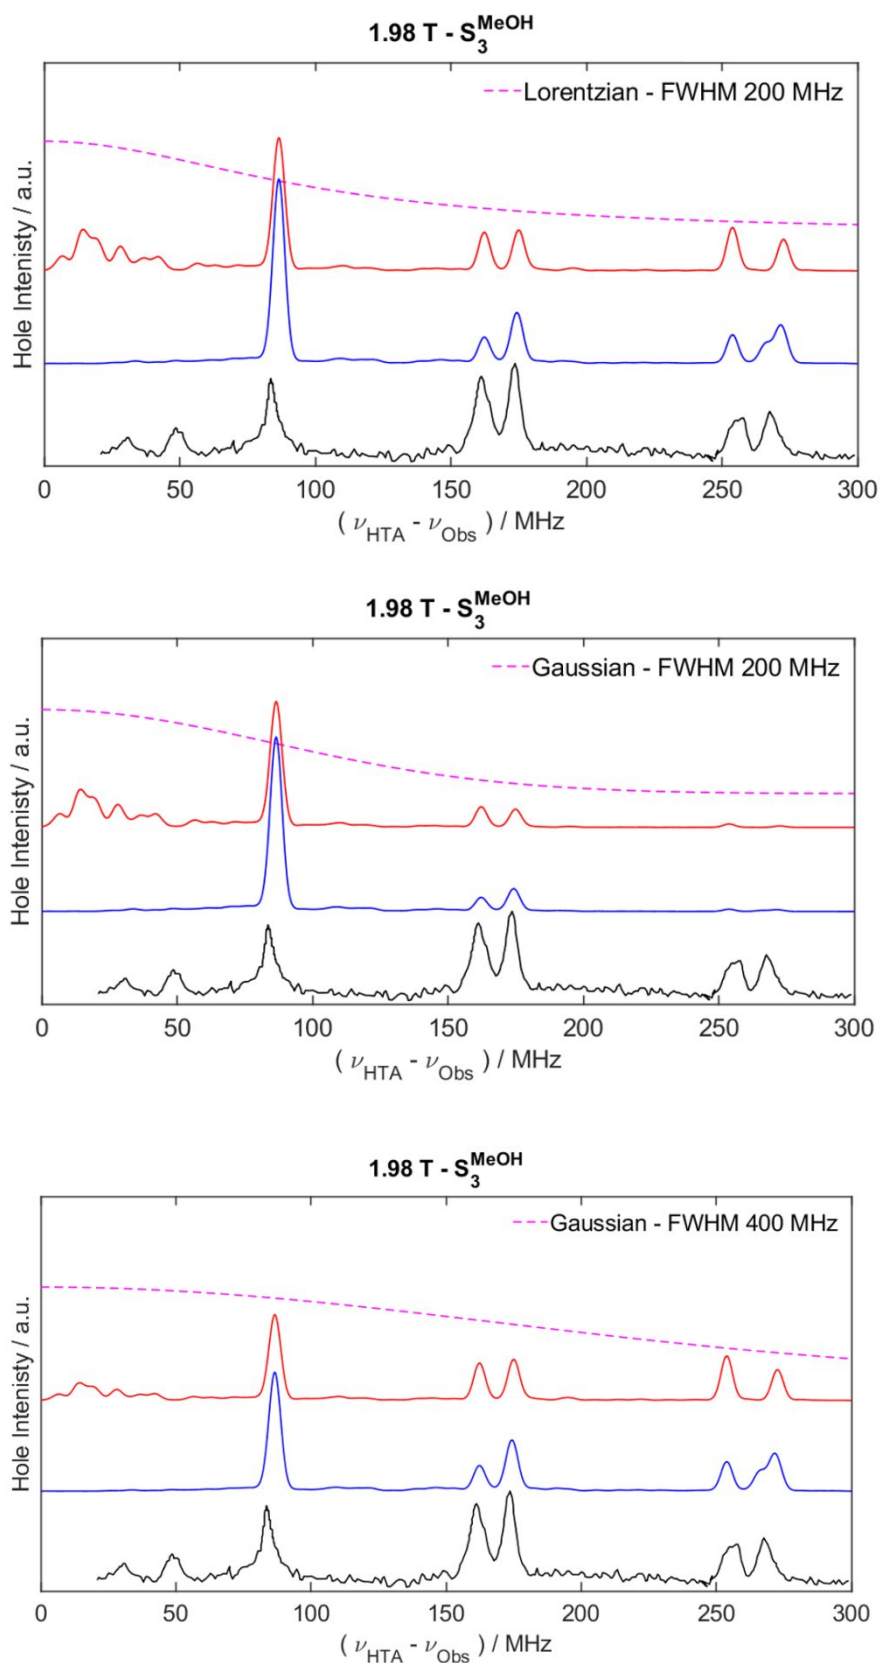

**Figure S6:** Variation in the applied bandwidth (Lineshape and FWHM) in simulations (red – this work; blue – Chrysina *et al.* simulation<sup>25</sup>) of experimental EDNMR data (black) on the MeOH trapped S<sub>3</sub> state in the WOC of PSII at 1.98 T.



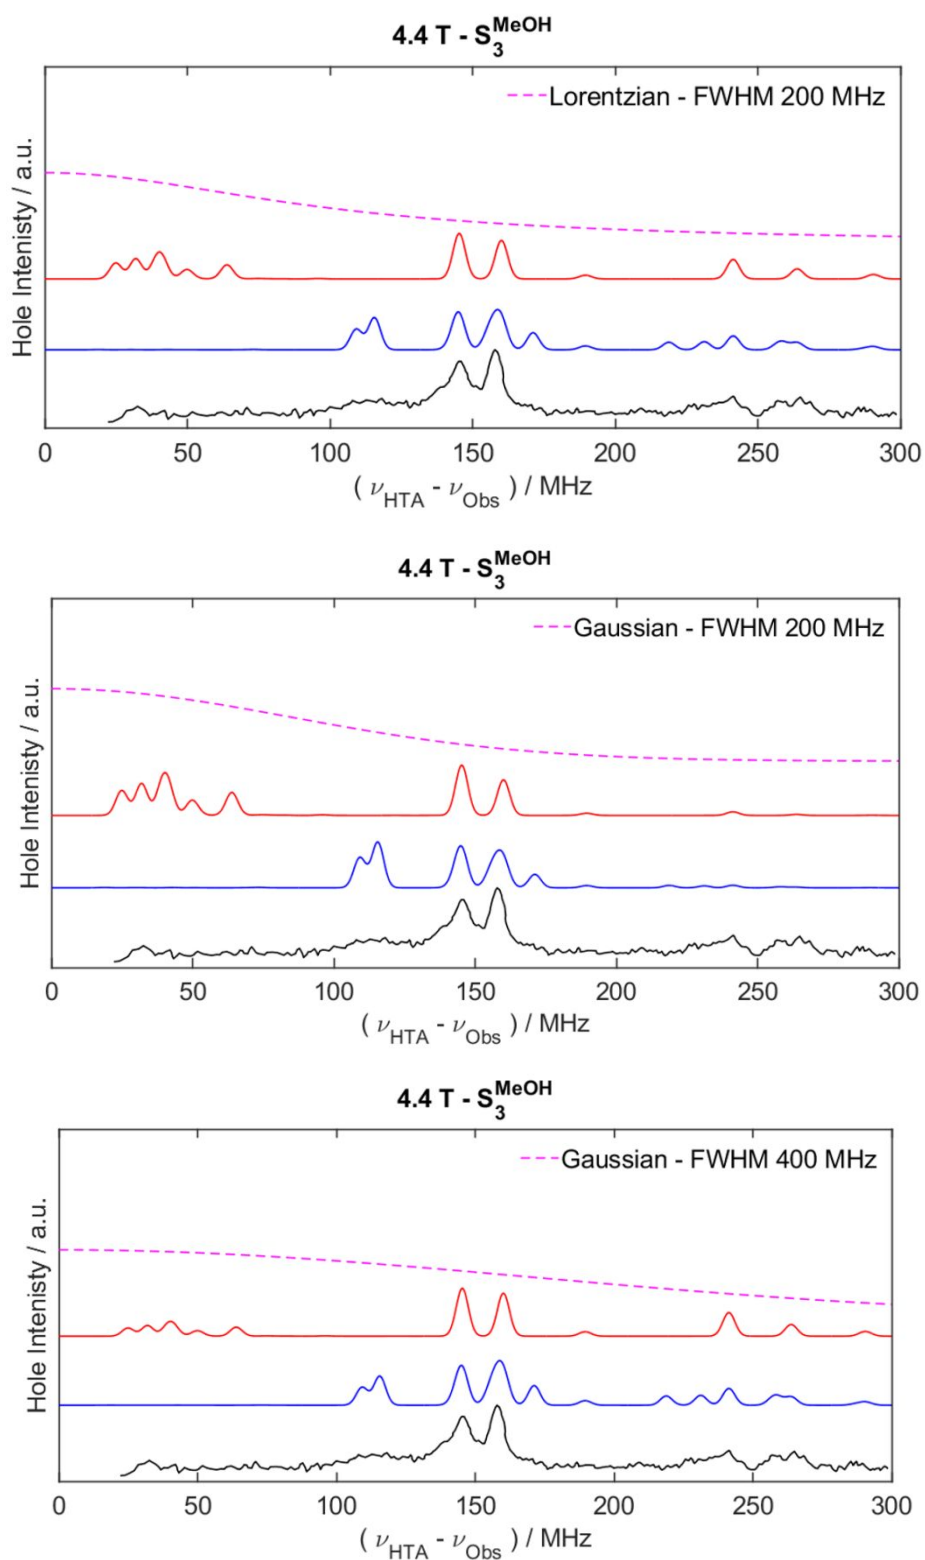

**Figure S7:** Variation in the applied bandwidth (Lineshape and FWHM) in simulations (red – this work; blue – Chrysina *et al.* simulation<sup>25</sup>) of experimental EDNMR data (black) on the MeOH trapped S<sub>3</sub> state in the WOC of PSII at 4.4 T.

## Consideration of multi-quantum effects in EDNMR

EDNMR simulations were performed including the coupling to two of the four Mn ions in turn and a single proton (it was not possible to include the couplings to all four Mn ions in the same simulation due to computational restraints). Four simulations including couplings to [Mn<sub>1</sub>, Mn<sub>2</sub>, <sup>1</sup>H], [Mn<sub>1</sub>, Mn<sub>4</sub>, <sup>1</sup>H], [Mn<sub>2</sub>, Mn<sub>4</sub>, <sup>1</sup>H] and [Mn<sub>3</sub>, Mn<sub>4</sub>, <sup>1</sup>H], were performed and the results summed. The simulations were performed with different amplitudes of the HTA pulse of  $4.7 \times 10^7 \text{ rad s}^{-1}$ , the same power used to generate the simulations shown in Figure 3 of the main paper, and  $4.7 \times 10^6 \text{ rad s}^{-1}$  for both open and closed cubane models. The results are displayed with the experimental results (black trace) and shown in the main text (Figure 4). Results were calculated for both the 1.98 T and 4.4 T datasets. It can be seen by comparing the results between Figure 3 and Figure 4 that at higher HTA amplitudes the multinuclear spectra differ significantly from the mononuclear and the experimental spectrum. Chrysina *et al.*<sup>25</sup> report the amplitude of the HTA to be  $4.7 \times 10^7 \text{ rad s}^{-1}$  at the centre of the blind spot however this will be lower further away from the central blind spot due to the resonator bandwidth. As such without an accurate report of the resonator bandwidth to include in the EDNMR calculation it is not possible to accurately determine the correct pulse amplitude that should be used at different frequency offsets. To this end as the pulse amplitude in the region  $\nu_{\text{HTA}} - \nu_{\text{Obs}} > 140 \text{ MHz}$ , where most of the signals are observed will be lower than  $4.7 \times 10^7 \text{ rad s}^{-1}$  and in this region the simulations for HTA pulse amplitude of  $4.7 \times 10^6 \text{ rad s}^{-1}$  gives good agreement with the summed mononuclear simulations, it was determined that summation of the mononuclear simulations is a reasonable approximation in regions of the spectra where the HTA amplitude is below  $4.7 \times 10^7 \text{ rad s}^{-1}$ . However, it must be remembered that without a recorded experimental resonator bandwidth it is not possible to know what the HTA amplitude should be at each offset frequency and consequently deviations in the calculated spectra presented in the main paper and the experimentally recorded data in the lower frequency region may be a result of intramolecular multi quantum transitions (MQTs) that are not considered in the simulations presented in Figure 3 of the main text. Interestingly in the simulations of the 1.98 T data using a HTA pulse amplitude of  $4.7 \times 10^6 \text{ rad s}^{-1}$ , the proton signal at 85 MHz offset is not reproduced (Figure 4, upper left plot) suggesting that the HTA pulse amplitude at this offset is likely greater than  $4.7 \times 10^6 \text{ rad s}^{-1}$ , as it is present in the calculations with higher HTA pulse amplitude. As signals are seen at this offset due to MQTs in the 4.4T simulations using the closed cubane parameters with HTA pulse amplitudes of both  $4.7 \times 10^6 \text{ rad s}^{-1}$  and  $4.7 \times 10^7 \text{ rad s}^{-1}$ , Figure 4 (right, top and bottom (blue traces)), this may be an indication that these parameters do not accurately reproduce the experimental data in all regards, as it would be expected that while the exact HTA pulse amplitude at each offset is unknown that the HTA pulse power at a specific offset would be constant between data recorded at different field positions if only the field position is changed. Further the application of a Lorentzian function, as discussed above, causes an increase in the amplitude of the signals calculated at low frequency relative to those calculated at high frequency and

may artificially inflate the amplitude of the low frequency signals. In all the EDNMR simulations calculated with the parameters for an open cubane structure (red traces), all significant low frequency signals lie below 50 MHz offset frequency in a region where disentangling these from the central blind-spot can cause uncertainty.

## References

- (1) Neese, F. Software Update: The ORCA Program System, Version 4.0. *Wiley Interdiscip. Rev. Comput. Mol. Sci.*, 2018, **8**, 1, e1327.
- (2) Corry, T. A.; O'Malley, P. J. Proton Isomers Rationalize the High- and Low-Spin Forms of the S<sub>2</sub> State Intermediate in the Water-Oxidizing Reaction of Photosystem II. *J. Phys. Chem. Lett.*, 2019, **10**, 17, 5226–5230.
- (3) Becke, A. D. Density-Functional Exchange-Energy Approximation with Correct Asymptotic Behavior. *Phys. Rev. A*, 1988, **38**, 6, 3098–3100.
- (4) Perdew, J. Density-Functional Approximation for the Correlation Energy of the Inhomogeneous Electron Gas. *Phys. Rev. B*, 1986, **33**, 12, 8822–8824.
- (5) Lenthe, E. Van; Baerends, E. J.; Snijders, J. G. Relativistic Regular Two-Component Hamiltonians. *J. Chem. Phys.* 1993, **99**, 6, 4597–4610.
- (6) van Lenthe, E.; Baerends, E. J.; Snijders, J. G. Relativistic Total Energy Using Regular Approximations. *J. Chem. Phys.* 1994, **101**, 11, 9783–9792.
- (7) van Wüllen, C. Molecular Density Functional Calculations in the Regular Relativistic Approximation: Method, Application to Coinage Metal Diatomics, Hydrides, Fluorides and Chlorides, and Comparison with First-Order Relativistic Calculations. *J. Chem. Phys.* 1998, **109**, 2, 392-399.

- (8) Weigend, F.; Ahlrichs, R. Balanced Basis Sets of Split Valence, Triple Zeta Valence and Quadruple Zeta Valence Quality for H to Rn: Design and Assessment of Accuracy. *Phys. Chem. Chem. Phys.* 2005, **7**, 18, 3297-3305.
- (9) Eichkorn, K.; Treutler, O.; Öhm, H.; Häser, M.; Ahlrichs, R. Auxiliary Basis Sets to Approximate Coulomb Potentials. *Chem. Phys. Lett.* 1995, **240**, 4, 283–289.
- (10) Eichkorn, K.; Weigend, F.; Treutler, O.; Ahlrichs, R. Auxiliary Basis Sets for Main Row Atoms and Transition Metals and Their Use to Approximate Coulomb Potentials. *Theor. Chem. Acc.* 1997, **97**, 119–124.
- (11) Weigend, F. Accurate Coulomb-Fitting Basis Sets for H to Rn. *Phys. Chem. Chem. Phys.* 2006, **8**, 9, 1057–1065.
- (12) Grimme, S.; Antony, J.; Ehrlich, S.; Krieg, H. A Consistent and Accurate *Ab Initio* Parametrization of Density Functional Dispersion Correction (DFT-D) for the 94 Elements H-Pu. *J. Chem. Phys.* 2010, **132**, 15, 154104.
- (13) Grimme, S.; Ehrlich, S.; Goerigk, L. Effect of the Damping Function in Dispersion Corrected Density Functional Theory. *J. Comput. Chem.* 2011, **32**, 7, 1456–1465.
- (14) Pantazis, D. A.; Ames, W.; Cox, N.; Lubitz, W.; Neese, F. Two Interconvertible Structures That Explain the Spectroscopic Properties of the Oxygen-Evolving Complex of Photosystem II in the S<sub>2</sub> State. *Angew. Chemie Int. Ed.* 2012, **51**, 39, 9935–9940.
- (15) Cox, N.; Retegan, M.; Neese, F.; Pantazis, D. A.; Boussac, A.; Lubitz, W. Photosynthesis. Electronic Structure of the Oxygen-Evolving Complex in Photosystem II Prior to O-O Bond Formation. *Science* 2014, **345**, 6198, 804–808.

- (16) Pantazis, D. A.; Orio, M.; Petrenko, T.; Zanten, V.; Bill, E.; Lubitz, W.; Messinger, J.; Neese, F. A New Quantum Chemical Approach to the Magnetic Properties of Oligonuclear Transition-Metal Complexes: Application to a Model for the Tetranuclear Manganese Cluster of Photosystem II. *Chem. - A Eur. J.* 2009, **15**, 20, 5108–5123.
- (17) Staroverov, V. N.; Scuseria, G. E.; Tao, J.; Perdew, J. P. Comparative Assessment of a New Nonempirical Density Functional: Molecules and Hydrogen-Bonded Complexes. *J. Chem. Phys.* 2003, **119**, 23.
- (18) Neese, F.; Wennmohs, F.; Hansen, A.; Becker, U. Efficient, Approximate and Parallel Hartree-Fock and Hybrid DFT Calculations. A “chain-of-Spheres” Algorithm for the Hartree-Fock Exchange. *Chem. Phys.* 2009, **356**, 98–109.
- (19) Neese, F. The ORCA Program System. *Wiley Interdiscip. Rev. Comput. Mol. Sci.* 2012, **2**, 1, 73–78.
- (20) Cox, N.; Ames, W.; Epel, B.; Kulik, L. V.; Rapatskiy, L.; Neese, F.; Messinger, J.; Wieghardt, K.; Lubitz, W. Electronic Structure of a Weakly Antiferromagnetically Coupled Mn(II) Mn(III) Model Relevant to Manganese Proteins: A Combined EPR, <sup>55</sup>Mn-ENDOR, and DFT Study. *Inorg. Chem.* 2011, **50**, 17, 8238–8251.
- (21) Sinnecker, S.; Neese, F.; Noodleman, L.; Lubitz, W. Calculating the Electron Paramagnetic Resonance Parameters of Exchange Coupled Transition Metal Complexes Using Broken Symmetry Density Functional Theory: Application to a Mn(III)/Mn(IV) Model Compound. *J. Am. Chem. Soc.* 2004, **126**, 8, 2613–2622.
- (22) Schinzel, S.; Kaupp, M. Validation of Broken-Symmetry Density Functional Methods for the Calculation of Electron Paramagnetic Resonance Parameters of Dinuclear

- Mixed-Valence Mn(IV) Mn(III) Complexes. *Can. J. Chem.* 2009, **87**, 10, 1521–1539.
- (23) Ames, W.; Pantazis, D. A.; Krewald, V.; Cox, N.; Messinger, J.; Lubitz, W.; Neese, F. Theoretical Evaluation of Structural Models of the S<sub>2</sub> State in the Oxygen Evolving Complex of Photosystem II: Protonation States and Magnetic Interactions. *J. Am. Chem. Soc.* 2011, **133**, 49, 19743–19757.
- (24) Corry, T. A.; O'Malley, P. J. S<sub>3</sub> State Models of Nature's Water Oxidizing Complex: Analysis of Bonding and Magnetic Exchange Pathways, Assessment of Experimental Electron Paramagnetic Resonance Data, and Implications for the Water Oxidation Mechanism. *J. Phys. Chem. B* 2021, **125**, 36, 10097–10107.
- (25) Chrysina, M.; Heyno, E.; Kutin, Y.; Reus, M.; Nilsson, H.; Nowaczyk, M. M.; DeBeer, S.; Neese, F.; Messinger, J.; Lubitz, W.; Cox, N. Five-Coordinate Mn<sup>IV</sup> Intermediate in the Activation of Nature's Water Splitting Cofactor. *Proc. Natl. Acad. Sci.* 2019, **116**, 34, 16841–16846.
- (26) Marchiori, D. A.; Debus, R. J.; Britt, R. D. Pulse EPR Spectroscopic Characterization of the S<sub>3</sub> State of the Oxygen-Evolving Complex of Photosystem II Isolated from *Synechocystis*. *Biochemistry* 2020, **59**, 51, 4864–4872.
